# Supplementary material for: Facile Synthesis of FAPbI3 Nanorods
Source: MDPI journal article supplement (doi:10.3390/nano10010072), 2019-12-29
Supplement: s1 [file s1]

## Supplementary Information for

# Facile Synthesis of FAPbI<sub>3</sub> Nanorods

He Huang<sup>1,\*</sup>, Linzhong Wu<sup>1</sup>, Yiou Wang<sup>1</sup>, Alexander F. Richter<sup>1</sup>, Markus Döblinger<sup>2</sup>, Jochen Feldmann<sup>1,\*</sup>

1 Chair for Photonics and Optoelectronics, Nano-Institute Munich, Department of Physics, Ludwig-Maximilians-Universität München (LMU), Königinstr. 10, 80539, Munich, Germany;  
Nanosystems Initiative Munich (NIM) and Center for NanoScience (CeNS), Schellingstr. 4, 80799, Munich, Germany

2 Department of Chemistry, Ludwig-Maximilians-Universität München, Butenandtstrasse 5-13 (E), 81377 Munich, Germany

\* Correspondence: he.huang@physik.uni-muenchen.de; feldmann@lmu.de

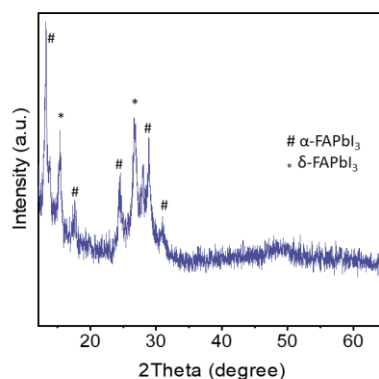

Figure S1: XRD data of FAPbI<sub>3</sub> perovskite nanorods.

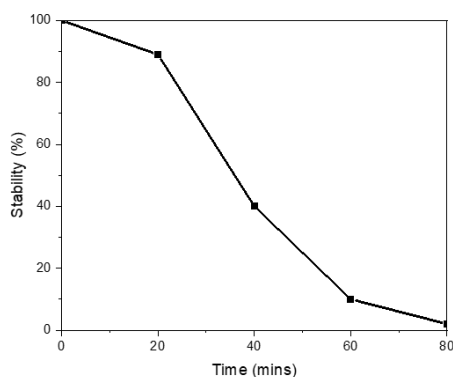

Figure S2: The stability of FAPbI<sub>3</sub> perovskite nanorods under UV illumination (365 nm, 12W) at ambient conditions: Change in the relative PL intensity of perovskite NC solutions vs UV illumination time.

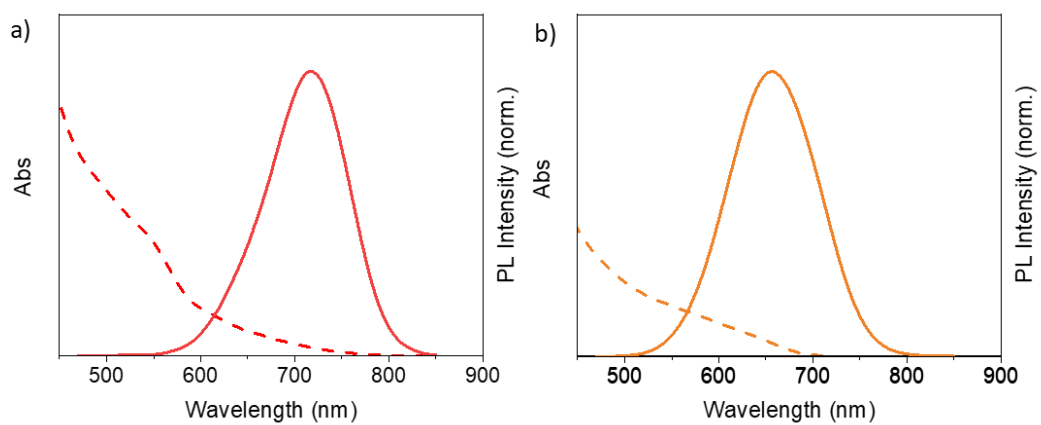

Figure S3: The representative absorption and PL for FAPbI<sub>3</sub> and FAPbBr<sub>x</sub>I<sub>3-x</sub> perovskite nanorods.
